# Supplementary material for: Molecular Structure and Phylogenetic Analyses of the Plastomes of Eight Sorbus Sensu Stricto Species
Source: MDPI journal article supplement (doi:10.3390/biom12111648), 2022-11-07
Supplement: s1 [file s1]

**Table S1.** The information of 20 *Sorbus* species used in this study.

| Species                                     | Accession Number | Geographical origin | Voucher number |
|---------------------------------------------|------------------|---------------------|----------------|
| <i>Sorbus amabilis</i>                      | OP613262         | Anhui               | Tangxs0324     |
| <i>S. discolor</i>                          | OP613260         | Shandong            | Lilan702       |
| <i>S. filipes</i>                           | OP613264         | Yunnan              | YMT3800-1-2003 |
| <i>S. hupehensis</i> var. <i>hupehensis</i> | OP613258         | Sichuan             | Gaoxf-0945     |
| <i>S. multijuga</i>                         | OP613261         | Sichuan             | LuoP202        |
| <i>S. pohuashanensis</i>                    | OP613257         | Liaoning            | Caow5157       |
| <i>S. reducta</i>                           | OP613259         | Sichuan             | Lij307         |
| <i>S. wilsoniana</i>                        | OP613263         | Sichuan             | YangQE3462     |
| <i>S. prattii</i>                           | MK814479         | Asia                |                |
| <i>S. setschwanensis</i>                    | MK914535         | Asia                |                |
| <i>S. commixta</i>                          | MK920288         | Asia                |                |
| <i>S. tianschanica</i>                      | MK920289         | Asia                |                |
| <i>S. aucuparia</i>                         | MT610101         | Europe              |                |
| <i>S. insignis</i>                          | MT677871         | Asia                |                |
| <i>S. munda</i>                             | MT683851         | Asia                |                |
| <i>S. hupehensis</i> var. <i>paucijuga</i>  | MT916771         | Asia                |                |
| <i>S. koehneana</i>                         | MW429483         | Asia                |                |
| <i>S. americana</i>                         | MZ984219         | North America       |                |
| <i>S. pteridophylla</i>                     | MZ984223         | Asia                |                |
| <i>S. rehderiana</i>                        | OK012001         | Asia                |                |
