# Supplementary material for: Molecular Structure and Phylogenetic Analyses of the Plastomes of Eight Sorbus Sensu Stricto Species
Source: MDPI journal article supplement (doi:10.3390/biom12111648), 2022-11-07
Supplement: s1 [file s1]

**Table S2.** Gene information of the different functional categories of 20 *Sorbus* plastomes

| Function of Genes                     | Group of Genes                   | Gene name                                                                                                                                                                                                                                                                                                                                                                                                                                                           |
|---------------------------------------|----------------------------------|---------------------------------------------------------------------------------------------------------------------------------------------------------------------------------------------------------------------------------------------------------------------------------------------------------------------------------------------------------------------------------------------------------------------------------------------------------------------|
| Photosynthesis                        | Photosystem I                    | <i>psaA, psaB, psaC, psaI, psaJ</i>                                                                                                                                                                                                                                                                                                                                                                                                                                 |
|                                       | Photosystem II                   | <i>psbA, psbB, psbC, psbD, psbE, psbF, psbH, psbI, psbJ, psbK, psbL, psbM, psbN, psbT, psbZ</i>                                                                                                                                                                                                                                                                                                                                                                     |
|                                       | Cytochrome b/f complex           | <i>petA, petB<sup>a</sup>, petD<sup>a</sup>, petG, petL, petN</i>                                                                                                                                                                                                                                                                                                                                                                                                   |
|                                       | ATP synthase                     | <i>atpA, atpB, atpE, atpF<sup>a</sup>, atpH, atpI</i>                                                                                                                                                                                                                                                                                                                                                                                                               |
|                                       | NADH-dehydrogenase               | <i>ndhA<sup>a</sup>, ndhB<sup>a</sup>, ndhC, ndhD, ndhE, ndhF, ndhG, ndhH, ndhI, ndhJ, ndhK</i>                                                                                                                                                                                                                                                                                                                                                                     |
|                                       | Large subunit Rubisco            | <i>rbcL</i>                                                                                                                                                                                                                                                                                                                                                                                                                                                         |
| Protein synthesis and DNA-replication | Subunits of RNA polymerase       | <i>rpoA, rpoB, rpoC1<sup>a</sup>, rpoC2</i>                                                                                                                                                                                                                                                                                                                                                                                                                         |
|                                       | Ribosomal protein small subunit  | <i>rps2, rps3, rps4, rps7<sup>*</sup>, rps8, rps11, rps12<sup>*b</sup>, rps14, rps15, rps16<sup>a</sup>, rps18, rps19</i>                                                                                                                                                                                                                                                                                                                                           |
|                                       | Ribosomal protein large subunit  | <i>rpl2<sup>*a</sup>, rpl14, rpl16<sup>a</sup>, rpl20, rpl22, rpl23<sup>*</sup>, rpl32, rpl33, rpl36</i>                                                                                                                                                                                                                                                                                                                                                            |
|                                       | Transfer RNAs                    | <i>trnA-UGC<sup>*a</sup>, trnC-GCA, trnD-GUC, trnE-UUC, trnF-GAA, trnG<sup>a</sup>-CAU, trnG-GCC, trnG-UCC<sup>a</sup>, trnH-GUG, trnI-CAU<sup>*</sup>, trnI-GAU<sup>*a</sup>, trnK-UUU<sup>a</sup>, trnL-CAA<sup>*</sup>, trnL-UAA<sup>a</sup>, trnL-UAG, trnM-CAU, trnN-GUU<sup>*</sup>, trnP-UGG, trnQ-UUG, trnR-ACG<sup>*</sup>, trnR-UCU, trnS-GCU, trnS-GGA, trnS-UGA, trnT-GGU, trnT-UGU, trnV-GAC<sup>*</sup>, trnV-UAC<sup>a</sup>, trnW-CCA, trnY-GUA</i> |
|                                       | Ribosomal RNAs                   | <i>rrn4.5<sup>*</sup>, rrn5<sup>*</sup>, rrn16<sup>*</sup>, rrn23<sup>*</sup></i>                                                                                                                                                                                                                                                                                                                                                                                   |
| Other genes                           | Maturase                         | <i>matK</i>                                                                                                                                                                                                                                                                                                                                                                                                                                                         |
|                                       | Translation initiation factor    | <i>infA</i>                                                                                                                                                                                                                                                                                                                                                                                                                                                         |
|                                       | C-type cytochrome synthesis gene | <i>ccsA</i>                                                                                                                                                                                                                                                                                                                                                                                                                                                         |
|                                       | Acetyl-CoA-carboxylase           | <i>accD</i>                                                                                                                                                                                                                                                                                                                                                                                                                                                         |
|                                       | Inner membrane protein           | <i>cemA</i>                                                                                                                                                                                                                                                                                                                                                                                                                                                         |
|                                       | ATP-dependent protease           | <i>clpP<sup>b</sup></i>                                                                                                                                                                                                                                                                                                                                                                                                                                             |
| Genes of unknown function             | Conserved hypothetical gene      | <i>ycf1, ycf2<sup>*</sup>, ycf3<sup>b</sup>, ycf4</i>                                                                                                                                                                                                                                                                                                                                                                                                               |

Note: \* indicates the duplicated gene number of repeat units is 2; <sup>a</sup>Gene contains a single intron; <sup>b</sup>Gene contains two introns
