# Supplementary figures and images for: Molecular Structure and Phylogenetic Analyses of the Plastomes of Eight Sorbus Sensu Stricto Species
Source: MDPI journal article supplement (doi:10.3390/biom12111648), 2022-11-07

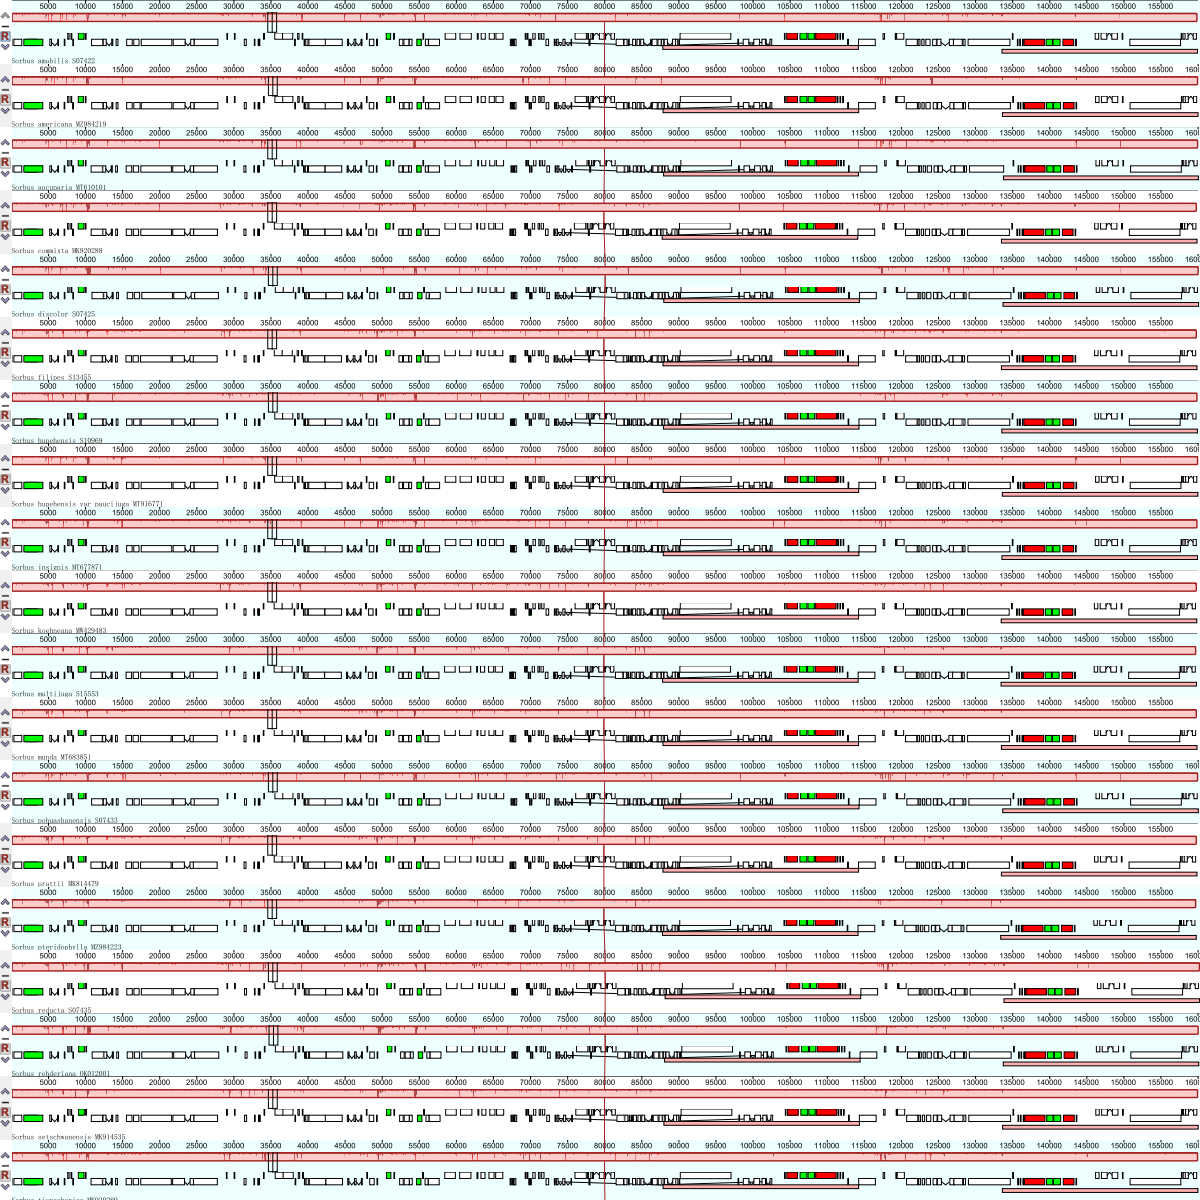

Supplement: s1 [file s1]

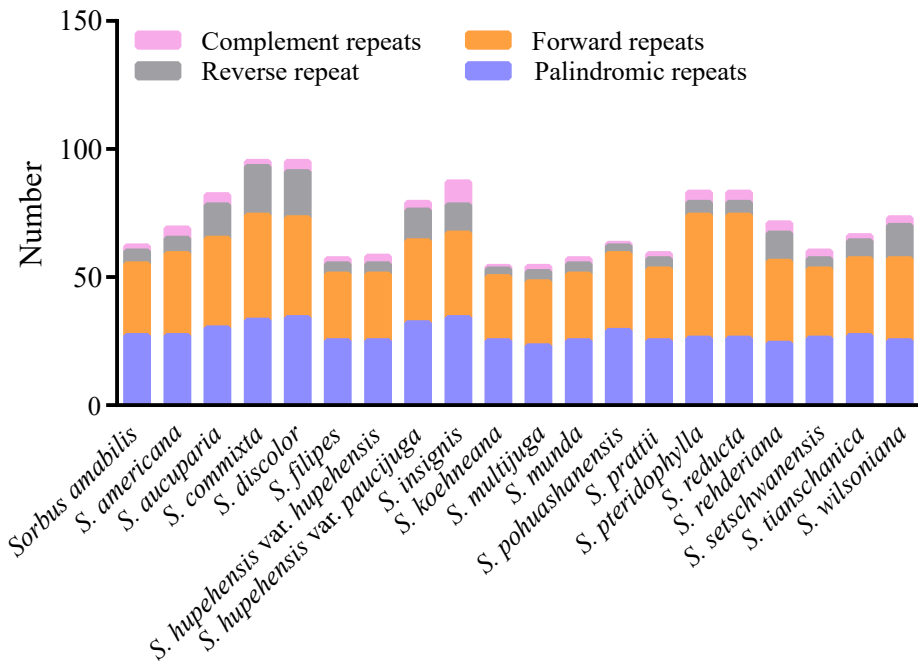

Supplement: s1 [file s1]
